# Supplementary material for: One Health Genomic Perspective on Pseudescherichia vulneris: A Neglected Reservoir of Last-Resort Resistance Genes
Source: Curr Microbiol. 2026 May 19;83(7):370. doi: 10.1007/s00284-026-04948-5 (PMC13186809; doi:10.1007/s00284-026-04948-5)
Supplement: Supplementary file 3 [file 284_2026_4948_MOESM3_ESM.xlsx]

## Sheet: Planilha1
Genome/Strain	Source	Collection date	Country	Sequencing Technology	Coverage	Assembly method	Total_size_bp	Num_contigs	N50_contigs	Num_scaffolds	N50_scaffolds	CheckM Analysis
												Completeness	Contamination
G3 [CP166292]	Healthy cat	2022	Brazil	Illumina NextSeq + minION	100x	SPAdes v. 3.15.2	4847318	3	4516683	3	4516683	1	0.0067
GCA_902164725.1 [NZ_LR607338.1]	Human feacal	2018	UK	Illumina	58x	Own	3773957	338	22053	338	22053	1	0
GCA_000759795.1 [ASM75979v1]	Human wound	2014	Japan	Illumina HiSeq 1000	130x	newbler v. 2.6	4374581	55	211214	55	211214	1	0
GCA_022049045.1 [ASM2204904v1]	Environmental	2020	South Korea: Cheonan Province	PacBio RSII; Illumina	34.02x	HGAP v. March-2021	4410867	2	4361689	2	4361689	1	0
GCA_026651835.1 [NZ_CP086374.1]	Homo sapiens	2020	China	Illumina HiSeq; Nanopore	100x	Canu v. v1.5	4653761	2	4346826	2	4346826	0.9917	0.0083
GCA_031975755.1 [ASM3197575v1]	Urban	2013	USA	Illumina	5.3x	SPAdes v. 3.15.2	3821679	327	18834	327	18834	0.7033	0
GCA_032054525.1 [ASM3205452v1]	Urban	2013	USA	Illumina	2.6x	SPAdes v. 3.15.2	3624282	1009	5491	1009	5491	0.8415	0.0138
GCA_032069025.1 [ASM3206902v1]	Urban	2013	USA	Illumina	23.6x	SPAdes v. 3.15.2	4356085	26	240051	26	240051	0.9832	0.0069
GCA_032071545.1 [ASM3207154v1]	Urban	2013	USA	Illumina	15.6x	SPAdes v. 3.15.2	4188060	19	370134	19	370134	0.9802	0.0056
GCA_032082095.1 [ASM3208209v1]	Urban	2013	USA	Illumina	5.3x	SPAdes v. 3.15.2	3326352	1159	3322	1159	3322	0.6121	0
GCA_032096375.1 [ASM3209637v1]	Urban	2013	USA	Illumina	2.4x	SPAdes v. 3.15.2	2740136	1321	2251	1321	2251	0.7121	0.0212
GCA_032556575.1 [ASM3255657v1]	Infant feces	2012	USA	Illumina HiSeq	36x	IDBA_UD v. v. 1.1.1	4158624	41	246376	41	246376	0.9786	0.0069
GCA_037145055.1 [ASM3714505v1]	Mosquito	2010	Madagascar	Illumina NovaSeq	121x	Shovill v. 1.1.0	4265155	52	527512	52	527512	0.9817	0.0092
GCA_037145215.1 [ASM3714521v1]	Mosquito	2010	Madagascar	Illumina NovaSeq	110x	Shovill v. 1.1.0	4264581	46	527393	46	527393	0.9817	0.0092
GCA_037145235.1 [ASM3714523v1]	Mosquito	2010	Madagascar	Illumina NovaSeq	153x	Shovill v. 1.1.0	4264982	46	552740	46	552740	0.9817	0.0092
GCA_037911215.1 [ASM3791121v1]	Grape vine xylem sap	2006	USA	Illumina	283x	SPAdes v. 3.15.2	4286543	39	367900	39	367900	1	0
NCTC12130 [SAMEA2612499]	Unkown	Unkown	Unkown	PacBio	100x	HGAP	4442322	2	4427509	2	4427509	0.9676	0.0077
ERR9969125 [SAMEA114445154]	Oral metagenome	2007	Australia	Illumina NovaSeq 6000	NA	NA	4248659	22	359463	22	359463	0.9743	0.0073
PP-BB6732-I [ERR4920664]	Human	2015	Pakistan	Illumina MiSeq	NA	NA	4569877	266	188000	266	188000	0.9787	0.0083
PP-BB6732r-I [ERR4920665]	Human	2015	Pakistan	Illumina MiSeq	NA	NA	4553157	195	365550	195	365550	0.9787	0.0006
271210 [SRR17302001]	Human	2016	UK	Illumina HiSeq 2500	NA	NA	4755694	112	188167	112	188167	0.979	0.0153
2038937_11 [SRR18030938]	Patient	2016	UK	Illumina HiSeq 4000	NA	NA	4843932	158	146583	158	146583	0.9817	0.013
2036850_12 [SRR18031180]	Patient	2016	UK	Illumina HiSeq 4000	NA	NA	4882953	149	199204	149	199204	0.979	0.02
2036850_11 [SRR18031317]	Patient	2016	UK	Illumina HiSeq 4000	NA	NA	4886495	161	203916	161	203916	0.979	0.02
2036850_15 [SRR18032359]	Patient	2016	UK	Illumina HiSeq 4000	NA	NA	4879917	176	96584	176	96584	0.979	0.0219
2022CK-00277 [SRR19008448]	Rectal swab	2022	USA	Illumina MiSeq	NA	NA	4751697	267	217942	267	217942	0.9817	0.0252
2023CJ-00030 [SRR23956492]	Rectal/Perirectal	2023	USA	Illumina MiSeq	NA	NA	4851532	535	216642	535	216642	0.9817	0.0223
41A21CPO012 [SRR24127693]	Stool/rectal swab	2021	Canada	Illumina MiSeq	NA	NA	4642380	123	181105	123	181105	0.979	0.0196
9885_1 [SRR3654271]	Clinical environmental sample	2015	UK	Illumina HiSeq 2000	NA	NA	4972516	158	277619	158	277619	0.9817	0.0208
E71 [SRR9697017]	ARJO bathroom	2014	Australia	Illumina HiSeq 2000	NA	NA	4867314	97	325619	97	325619	0.9847	0.0103
NA = NOT APPLICABLE
