# Supplementary material for: One Health Genomic Perspective on Pseudescherichia vulneris: A Neglected Reservoir of Last-Resort Resistance Genes
Source: Curr Microbiol. 2026 May 19;83(7):370. doi: 10.1007/s00284-026-04948-5 (PMC13186809; doi:10.1007/s00284-026-04948-5)
Supplement: Supplementary file 4 [file 284_2026_4948_MOESM4_ESM.xlsx]

## Sheet: Planilha1
Genome	aac(3)-IIe	aac(3)-IIg	aac(6')-Ib3	aac(6')-Ib-cr5	aac(6')-Ib-cr	aac(6')-IIc	aph(3")-Ib (strA)	aph(3")-IIa	aph(6)-Ia	aph(6)-Id (strB)	ant(2")-Ia	ant(3")-Ia (aadA1)	acrA	acrB	acrD	acrF	adeB	ADP-arr (ARR-3)	bacA	baeR	baeS	bcr	blaAMPH	cAMP	catA	catB3	cob(l)alanin	cpxA	cpxR	CRP	CTX-M-9	CTX-M-15	dfrA14	dfrA16	dfrA19	DHA-1	emrA	emrB	emrD	emrR	eptA	ereA	fosA	H-NS	IMP-4	KDEA	kdpE	KPC-2	KPC-3
GCA_000759795 (ASM75979v1)
GCA_022049045 (ASM2204904v1)
GCA_026651835 (NZ_CP086374.1)
GCA_031975755 (ASM3197575v1)
GCA_032054525 (ASM3205452v1)
GCA_032069025 (ASM3206902v1)
GCA_032071545 (ASM3207154v1)
GCA_032082095 (ASM3208209v1)
GCA_032096375 (ASM3209637v1)
GCA_032556575 (ASM3255657v1)
GCA_037145055 (ASM3714505v1)
GCA_037145215 (ASM3714521v1)
GCA_037145235 (ASM3714523v1)
GCA_037911215 (ASM3791121v1)
NCTC12130 (SAMEA2612499)
GCA_902164725 (NZ_LR607338.1)
ERR9969125 (SAMEA114445154)
G3 (CP166292)
PP-BB6732-I (ERR4920664)
PP-BB6732r-I (ERR4920665)
9885_1 (SRR3654271)
E71 (SRR9697017)
271210 (SRR17302001)
2038937_11 (SRR18030938)
2036850_12 (SRR18031180)
2036850_11 (SRR18031317)
2036850_15 (SRR18032359)
2022CK-00277 (SRR19008448)
2023CJ-00030 (SRR23956492)
41A21CPO012 (SRR24127693)
[truncated: 51 more columns]
