# Supplementary material for: One Health Genomic Perspective on Pseudescherichia vulneris: A Neglected Reservoir of Last-Resort Resistance Genes
Source: Curr Microbiol. 2026 May 19;83(7):370. doi: 10.1007/s00284-026-04948-5 (PMC13186809; doi:10.1007/s00284-026-04948-5)
Supplement: Supplementary file 5 [file 284_2026_4948_MOESM5_ESM.xlsx]

## Sheet: Planilha1
Genome	cadA	cheB	cheW	cheY	clpK1	csgB	csgG	entB	fepG	flgC	flgG	flgH	flhA	flhC	fliA	fliG	fliH	fliI	fliJ	fliM	fliN	fliP	fliQ	fliY	motA	Nlpl	tlra	terC	Z1307
GCA_000759795 (NBRC 102420)	1	1	1	1	0	1	0	1	0	1	1	1	1	1	1	1	1	0	0	1	1	1	0	1	1	1	1	0	1
GCA_022049045 (CA-7)	1	1	0	1	0	1	1	1	0	1	1	1	1	1	1	1	1	0	0	1	1	1	1	1	1	1	1	0	1
GCA_026651835 (KY109)	1	1	1	1	0	1	1	1	0	1	1	1	1	1	1	1	1	1	0	1	1	1	1	1	1	1	1	1	1
GCA_031975755 (CTOTU46713)	1	0	1	1	0	1	1	1	0	1	1	1	0	1	1	1	1	1	0	0	1	1	0	0	1	0	0	0	0
GCA_032054525 (CTOTU49224)	0	1	1	1	0	1	0	1	0	1	1	0	0	1	0	1	1	0	0	1	1	0	0	1	0	1	0	0	0
GCA_032069025 (CTOTU49571)	1	1	1	1	0	1	1	1	0	1	1	1	1	1	1	1	1	1	0	1	1	1	0	1	1	1	0	0	1
GCA_032071545 (CTOTU48385)	1	1	1	1	0	1	0	1	0	1	1	1	1	1	1	1	1	1	0	1	1	1	0	1	0	1	0	0	1
GCA_032082095 (CTOTU50784)	0	0	1	0	0	1	0	0	0	0	1	1	0	1	0	0	1	1	0	1	0	1	0	0	0	0	0	0	0
GCA_032096375 (CTOTU50197)	0	1	0	0	0	0	0	0	0	1	0	1	0	1	0	0	1	0	0	0	1	0	0	0	0	0	0	0	1
GCA_032556575 (N2_066_017G1)	1	1	1	1	1	1	0	1	0	1	1	1	1	1	1	1	1	0	0	1	1	1	0	1	0	1	0	0	1
GCA_037145055 (USHLN191)	1	1	1	1	0	1	0	1	0	1	1	1	1	1	1	1	1	0	0	1	1	1	0	1	1	1	0	0	1
GCA_037145215 (USHLN180)	1	1	1	1	0	1	0	1	0	1	1	1	1	1	1	1	1	0	0	1	1	1	0	1	1	1	0	0	1
GCA_037145235 (USHLN178)	1	1	1	1	0	1	0	1	0	1	1	1	1	1	1	1	1	0	0	1	1	1	0	1	1	1	0	0	1
GCA_037911215 (RIT_GXS21)	1	1	1	1	0	1	1	1	1	1	1	1	1	1	1	1	0	0	0	1	1	1	1	1	1	1	0	0	1
GCA_900450975 (NCTC12130)	1	1	1	1	0	1	0	1	0	1	1	1	1	1	1	1	1	0	0	1	1	1	0	1	1	1	0	0	1
GCA_902164725 (4928STDY7071515)	1	1	1	1	0	1	0	1	0	1	1	1	1	1	1	1	1	0	0	1	1	1	0	1	0	1	0	0	1
GCA_963526875 (ERR9969125)	1	1	1	1	0	1	0	1	0	1	1	1	1	1	1	1	1	0	0	1	1	1	0	1	1	1	0	0	1
GPES0212	1	1	1	1	0	1	0	1	0	1	1	1	1	1	1	1	1	1	0	1	1	1	0	1	1	1	1	1	1
ERR4920664 (PP-BB6732-I)	1	1	0	1	0	1	0	1	0	1	1	1	1	1	1	1	0	1	0	1	1	1	0	1	0	1	1	0	1
ERR4920665 (PP-BB6732r-I)	1	1	0	1	0	1	0	1	0	1	1	1	1	1	1	1	0	1	0	1	1	1	0	1	0	1	1	0	1
SRR3654271 (9885_1)	1	1	1	1	0	1	0	1	0	1	1	1	1	1	1	1	1	0	0	1	1	1	0	1	0	1	1	1	1
SRR9697017 (E71)	1	1	1	1	0	1	0	1	0	1	1	1	1	1	1	1	1	1	0	1	1	1	0	1	1	1	1	1	1
SRR17302001 (271210)	1	1	1	1	0	1	0	1	0	1	1	1	1	1	1	1	0	1	0	1	1	1	0	1	1	1	0	1	1
SRR18030938 (2038937_11)	1	1	1	1	0	1	0	1	0	1	1	1	1	1	1	1	1	0	0	1	1	1	0	1	0	1	0	1	1
SRR18031180 (2036850_12)	1	1	1	1	0	1	0	1	0	1	1	1	1	1	1	1	0	1	1	1	1	1	0	1	1	1	0	1	1
SRR18031317 (2036850_11)	1	1	1	1	0	1	0	1	0	1	1	1	1	1	1	1	0	1	1	1	1	1	0	1	1	1	1	1	1
SRR18032359 (2036850_15)	1	1	1	1	0	1	0	1	0	1	1	1	1	1	1	1	0	1	1	1	1	1	0	1	1	1	1	1	1
SRR19008448 (2022CK-00277)	1	1	1	1	0	0	0	1	0	1	1	1	1	1	1	1	1	0	0	1	1	1	0	1	0	1	0	0	1
SRR23956492 (2023CJ-00030)	1	1	1	1	0	0	0	1	0	1	1	1	1	1	1	1	1	0	0	1	1	1	0	1	0	1	0	0	1
SRR24127693 (41A21CPO012)	1	1	1	1	1	0	0	1	0	1	1	1	1	1	1	1	1	1	1	1	1	1	0	1	0	1	0	0	1
